# Supplementary material for: Continuous glucose monitoring reveals glycemic variability and hypoglycemia after vertical sleeve gastrectomy in rats
Source: PubMed Central journal article supplement — Mol Metab. 2019 Dec 24;32:148–59. doi: 10.1016/j.molmet.2019.12.011 (PMC7005148; doi:10.1016/j.molmet.2019.12.011), 2019-12-24
Supplement: mmc1.pdf [file mmc1.pdf]

1 **Supplementary Table 1.** Blood glucose levels of sham vs. VSG rats at each time interval during  
 2 solid and liquid meals.

| Time after re-fed               |           | Sham      | VSG        | Significance      |
|---------------------------------|-----------|-----------|------------|-------------------|
| <i>Solid meal (ad lib)</i>      |           |           |            |                   |
| Fasting                         | Ave. BG   | 6.4 ± 0.2 | 6.4 ± 0.2  | P=0.991           |
|                                 | Median BG | 6.4 ± 0.0 | 6.3 ± 0.1  | P=0.291           |
| 0-0.5 h                         | Peak BG   | 6.7 ± 0.3 | 8.0 ± 0.3  | <b>P=0.020*</b>   |
|                                 | Ave. BG   | 6.4 ± 0.2 | 7.1 ± 0.4  | <b>P=0.000***</b> |
| 0.5-1.0 h                       | Peak BG   | 6.3 ± 0.2 | 7.2 ± 0.3  | P=0.053           |
|                                 | Ave. BG   | 6.1 ± 0.2 | 6.5 ± 0.3  | <b>P=0.000***</b> |
| 1.0-1.5 h                       | Peak BG   | 6.6 ± 0.3 | 7.5 ± 0.3  | P=0.067           |
|                                 | Ave. BG   | 6.3 ± 0.2 | 6.9 ± 0.3  | <b>P=0.000***</b> |
| 1.5h-2.0h                       | Peak BG   | 6.8 ± 0.3 | 7.6 ± 0.3  | P=0.107           |
|                                 | Ave. BG   | 6.6 ± 0.3 | 6.9 ± 0.3  | <b>P=0.016*</b>   |
| <i>Solid meal (fixed meal)</i>  |           |           |            |                   |
| 0-0.5 h                         | Peak BG   | 7.2 ± 0.4 | 8.5 ± 0.3  | <b>P=0.015*</b>   |
|                                 | Ave. BG   | 6.4 ± 0.4 | 7.3 ± 0.4  | <b>P=0.000*</b>   |
| 0.5-1.0 h                       | Peak BG   | 6.6 ± 0.3 | 7.8 ± 0.6  | P=0.170           |
|                                 | Ave. BG   | 6.3 ± 0.3 | 6.3 ± 0.5  | P=0.875           |
| 1.0-1.5 h                       | Peak BG   | 6.7 ± 0.3 | 7.9 ± 0.7  | P=0.182           |
|                                 | Ave. BG   | 6.5 ± 0.3 | 6.6 ± 0.5  | P=0.469           |
| 1.5h-2.0h                       | Peak BG   | 7.1 ± 0.4 | 8.4 ± 0.8  | P=0.200           |
|                                 | Ave. BG   | 6.8 ± 0.4 | 6.8 ± 0.7  | P=0.796           |
| <i>Liquid meal (ad lib)</i>     |           |           |            |                   |
| Fasting                         | Ave. BG   | 6.7 ± 0.2 | 5.6 ± 0.3  | <b>P=0.027*</b>   |
|                                 | Median BG | 6.8 ± 0.2 | 5.5 ± 0.4  | <b>P=0.016*</b>   |
| 0-0.5 h                         | Peak BG   | 7.6 ± 0.4 | 9.1 ± 0.8  | P=0.186           |
|                                 | Ave. BG   | 7.0 ± 0.3 | 7.3 ± 0.5  | P=0.753           |
| 0.5-1.0 h                       | Peak BG   | 6.7 ± 0.2 | 6.6 ± 0.5  | P=0.866           |
|                                 | Ave. BG   | 6.5 ± 0.2 | 5.7 ± 0.5  | P=0.180           |
| 1.0-1.5 h                       | Peak BG   | 7.3 ± 0.3 | 8.0 ± 0.6  | P=0.367           |
|                                 | Ave. BG   | 6.9 ± 0.3 | 6.7 ± 0.5  | P=0.779           |
| 1.5h-2.0h                       | Peak BG   | 7.5 ± 0.3 | 7.6 ± 0.6  | P=0.890           |
|                                 | Ave. BG   | 7.2 ± 0.3 | 6.4 ± 0.5  | P=0.234           |
| <i>Liquid meal (fixed meal)</i> |           |           |            |                   |
| 0-0.5 h                         | Peak BG   | 9.6 ± 0.8 | 11.5 ± 0.9 | P=0.140           |
|                                 | Ave. BG   | 8.2 ± 0.5 | 8.6 ± 0.7  | P=0.616           |
| 0.5-1.0 h                       | Peak BG   | 7.9 ± 0.7 | 8.5 ± 1.0  | P=0.691           |
|                                 | Ave. BG   | 7.3 ± 0.6 | 4.8 ± 0.8  | <b>P=0.044*</b>   |
| 1.0-1.5 h                       | Peak BG   | 7.4 ± 0.4 | 5.0 ± 0.6  | <b>P=0.012*</b>   |
|                                 | Ave. BG   | 7.2 ± 0.4 | 4.5 ± 0.7  | <b>P=0.009**</b>  |
| 1.5h-2.0h                       | Peak BG   | 7.1 ± 0.4 | 5.4 ± 0.6  | <b>P=0.039*</b>   |
|                                 | Ave. BG   | 6.9 ± 0.3 | 4.9 ± 0.6  | <b>P=0.016*</b>   |

1 #Abbreviations: Ave. BG, average blood glucose. Blood glucose levels (mmol/L) were  
2 represented as Mean  $\pm$  SEM. \*P<0.05; \*\*P<0.01; \*\*\*P<0.001 for Sham vs. VSG.

3

4

5

6

1

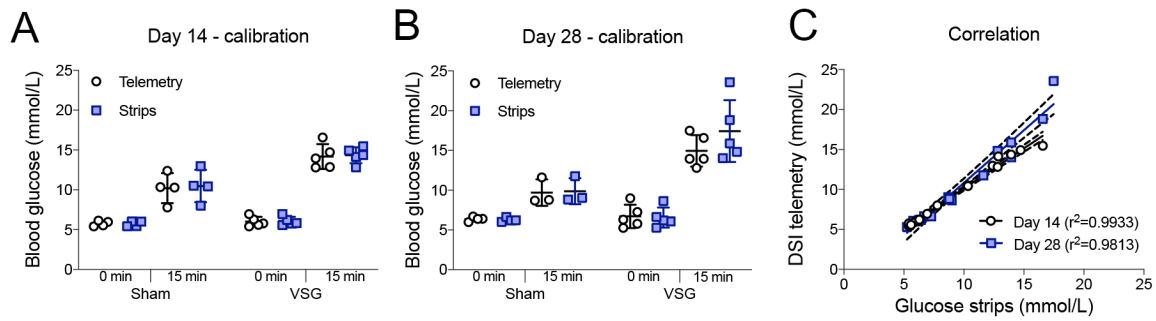

2

3 **Figure S1. Telemetry calibration.** (A-B) Blood glucose measured from the rat aorta (telemetry)  
4 vs. from tail vein (glucose strip) at 14 days (A) and 28 days (B) after surgery. Glucose was orally  
5 administered to overnight fasted rats. (C) Correlation between the blood glucose measured by  
6 telemetry and glucose strips.

7

8

1

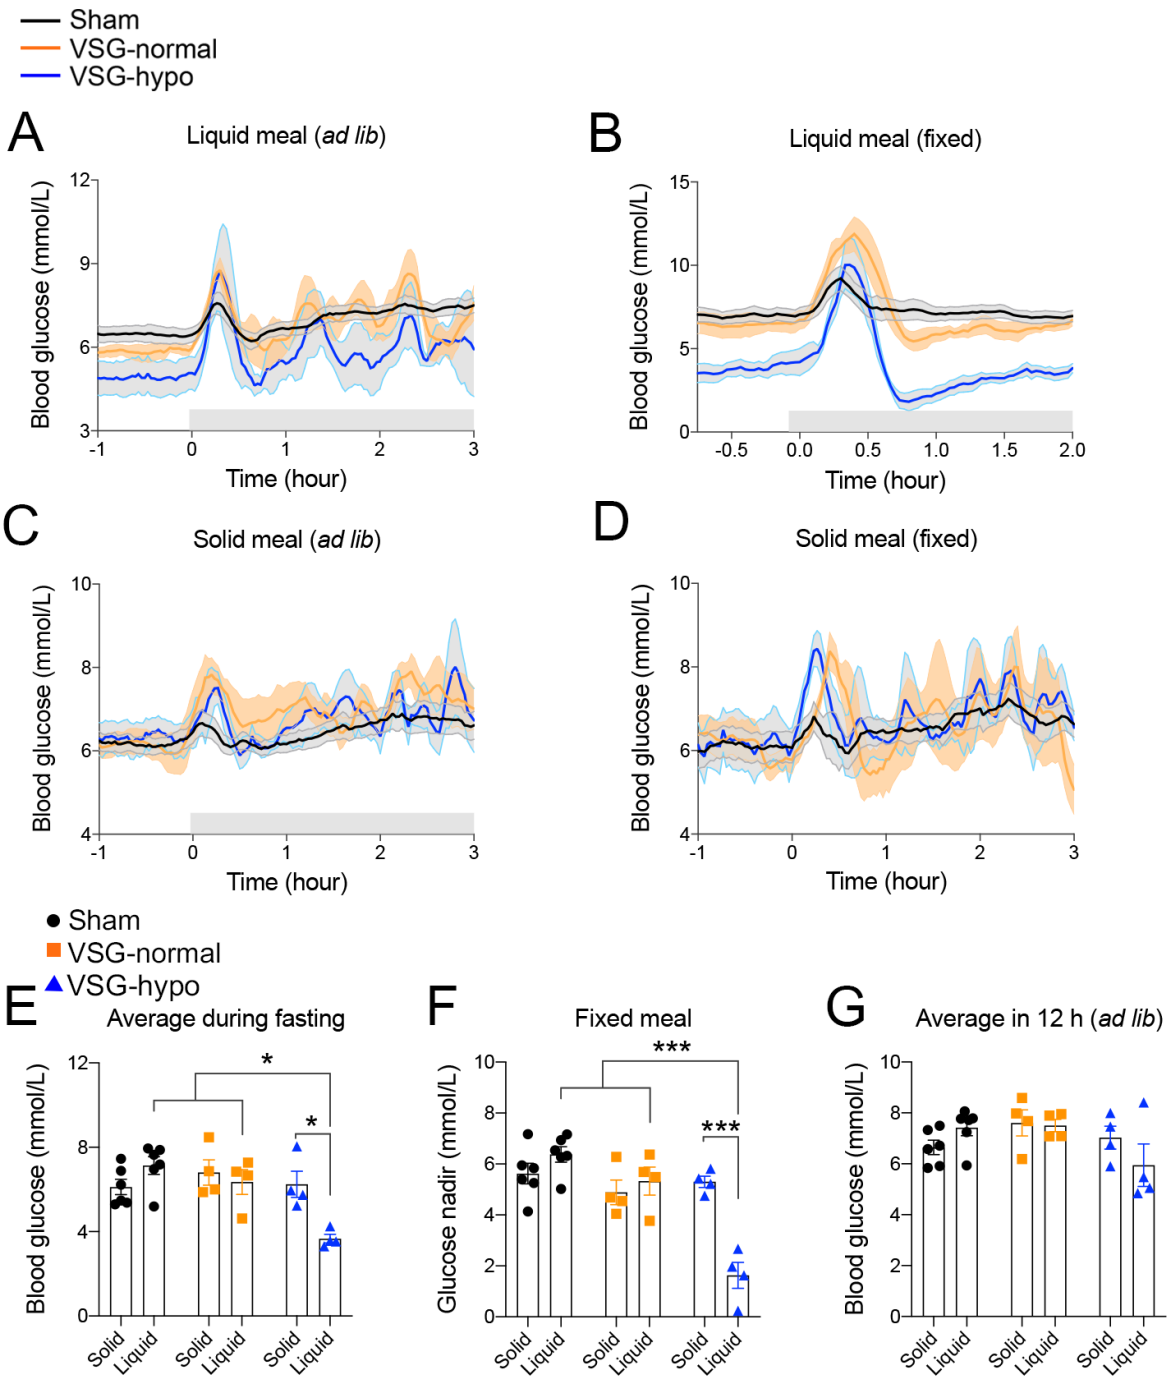

2

3 **Figure S2. Differential response to the continued fasting and liquid meal re-feeding**

4 **condition in VSG rats. (A-B) Blood glucose levels during *ad lib* (A) or fixed (B, 2 ml single**

5 **gavage, Ensure plus®) liquid meal ingestion. The *ad lib* feeding data represented as the average**

1 of 3-consecutive days of blood glucose measurements. (C-D) Blood glucose levels during ad lib  
2 (C) or fixed (D, 1.5 g, 45% HFD) solid meal ingestion. The *ad lib* feeding data represented as the  
3 average of 3-consecutive days of blood glucose measurements. (E-F) Fasting glucose levels (E)  
4 and glucose nadir (F) after solid vs. liquid fixed meal ingestion. \*P<0.05, \*\*\*P<0.001 (diet ×  
5 surgery). (G) Average blood glucose during 12 h after solid vs. liquid ad lib meal.  
6 All data are represented as Mean ± SEM. All rats were fasted for 6 h prior to the food returns.  
7 Food was returned at the onset of the dark phase. Sham (n=6), VSG-normal (n=4), VSG-hypo  
8 (n=4).

9  
10  
11  
12

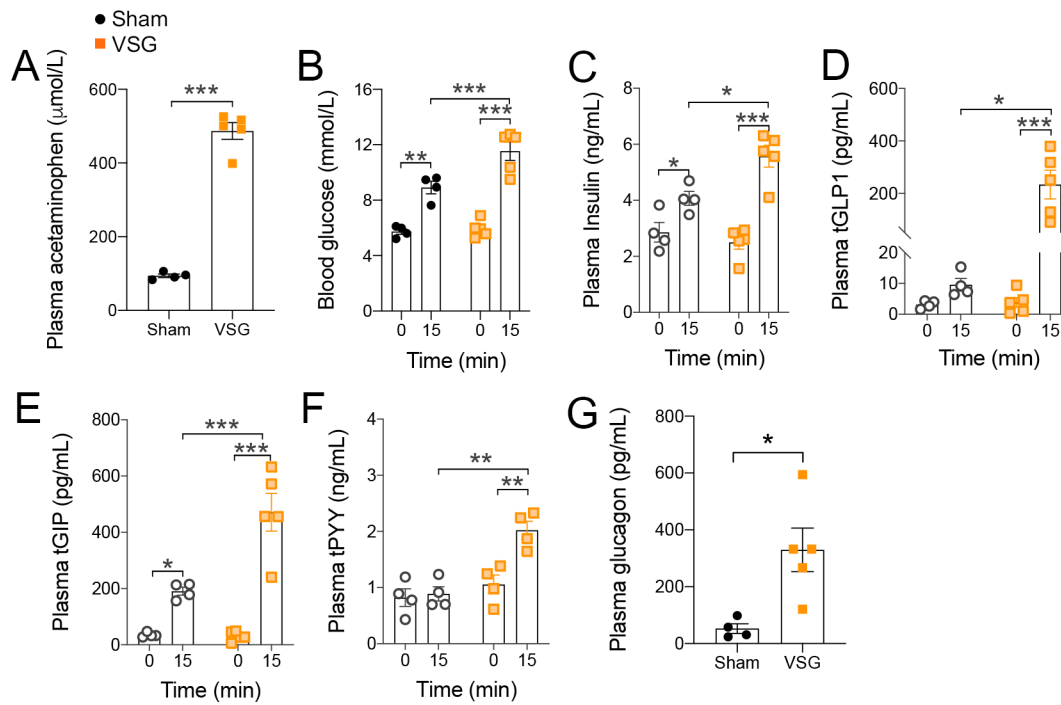

1  
 2 **Figure S3. Endocrine changes after VSG contributing dynamic blood glucose levels.** (A)  
 3 Plasma acetaminophen levels at 15 min after a single mixed-liquid meal ingestion. \*\*\* $P < 0.001$ .  
 4 (B-F) Blood glucose (B), plasma insulin (C), plasma total GLP-1 (D), plasma total GIP (E), and  
 5 plasma total PYY (F) levels before and after a single mixed-liquid meal ingestion. \* $P < 0.05$ ,  
 6 \*\* $P < 0.01$ , \*\*\* $P < 0.001$  (surgery  $\times$  time). (G) Plasma glucagon levels at 15 min after a single  
 7 mixed-liquid meal ingestion. \* $P < 0.001$ . All data was obtained from the cohort 2 and represented  
 8 as Mean  $\pm$  SEM. Sham (n=4), VSG (n=5).

9  
 10

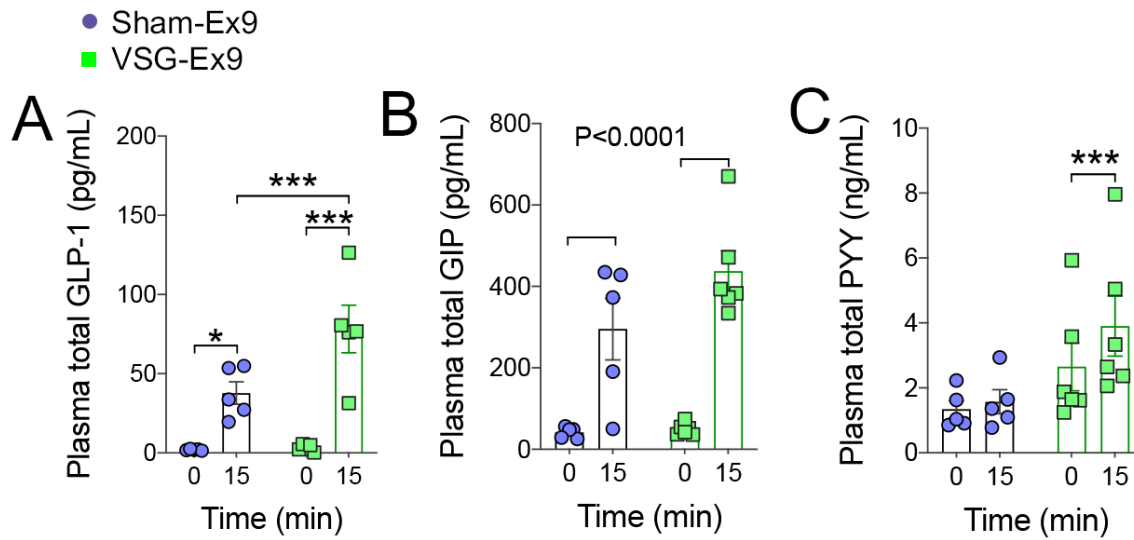

1  
 2 **Figure S4. Endocrine changes after VSG after blockade of GLP-1 receptor.** (A-C) Plasma  
 3 total GLP-1 (A), total GIP (B), glucagon (C), and total PYY (D) levels after a single mixed-meal  
 4 ingestion in Sham and VSG rats with an Ex9 pre-injection. All data represented as Mean  $\pm$  SEM.  
 5 Sham (n=5), VSG (n=6). (A, C) \*P<0.05, \*\*\*P<0.001 (surgery  $\times$  time). (B) Main effect of time  
 6 was observed in both drug groups.

7  
 8  
 9
